# Supplementary material
Source: publisher figshare collection journal article supplement (https://karger.figshare.com/ndownloader/files/15050594)
Supplement: Supplementary file 1 [file 15050594]

**SUPPLEMENTARY MATERIAL**

**Supplemental Figure 1. Gene ontology analysis shows enrichment of plasma membrane, cytoskeletal fibers, and keratin filaments in UPEC-infected urinary exosomes.** Enrichment ofcellular components was analyzed using the ranked NSAF values of UPEC-infected murine urinary exosomes. Analyses and graphics were generated using GOrilla (<http://cbl-gorilla.cs.technion.ac.il>). *P* value ranges are indicated in color scale.

**Supplemental Figure 2. Gene ontology analysis shows enrichment of keratinization, cytoskeleton organization, and humoral immune responses in UPEC-infected urinary exosomes.** Enrichment ofbiological processes was analyzed using the ranked NSAF values of UPEC-infected murine urinary exosomes. Analyses and graphics were generated using GOrilla (<http://cbl-gorilla.cs.technion.ac.il>). *P* value ranges are indicated in color scale.

**Supplemental Figure 3. Augmentation of lactoferrin or HIF-1α stabilization does not alter endogenous HIF-1α or lactoferrin levels respectively.** (**A**) Normalized bioluminescence of HTB-9 hypoxia response element (HRE) Reporter cells treated with hLf (250 µg/mL), AKB-4924 (255 nM), or deferoxamine (DFO, 300 µM) for 6 h. (**B**) Lactoferrin concentrations of HTB-9 cell lysate treated for 4 h with AKB-4924 (255 nM), vehicle, or mock-treated as measured by ELISA. Symbols represent means of independent experiments (*n* = 3-7) with lines indicating mean ± SEM. Data was analyzed using one-way ANOVA with Tukey’s multiple comparisons test (A) or Holm-Sidak’s multiple comparisons test (B). (**C**) Lactoferrin concentration of bladder homogenates from Hif1αfl/fl/K14-Cre+ and Hif1αfl/fl/K14-Cre- infected with 2-3 × 107 CFU CFT073 for 24 h as measured by ELISA. Symbols represent biological replicates (*n* = 7/group) with lines indicating median with 95% confidence interval. Data was analyzed using two-tailed Mann-Whitney test. ***P*<0.01,**P*<0.05, or n.s. is not significant.

**Supplemental Table 1. Proteins identified in LC-MS/MS analyses of UPEC-infected and uninfected murine urinary exosomes.**
